# Supplementary material for: Nutritional Education Is an Effective Tool in Improving Beverage Assortment in Nurseries in Poland
Source: MDPI journal article supplement (doi:10.3390/healthcare9030274), 2021-03-03

**Figure S1. The overview of the project Eating healthy, growing healthy. \*DCCs – day care centers.**  
Source: Myszkowska-Ryciak, J.; Harton, A. Do preschools offer healthy beverages to children? A nationwide study in Poland. *Nutrients* 2017. DOI: 10.3390/nu9111167

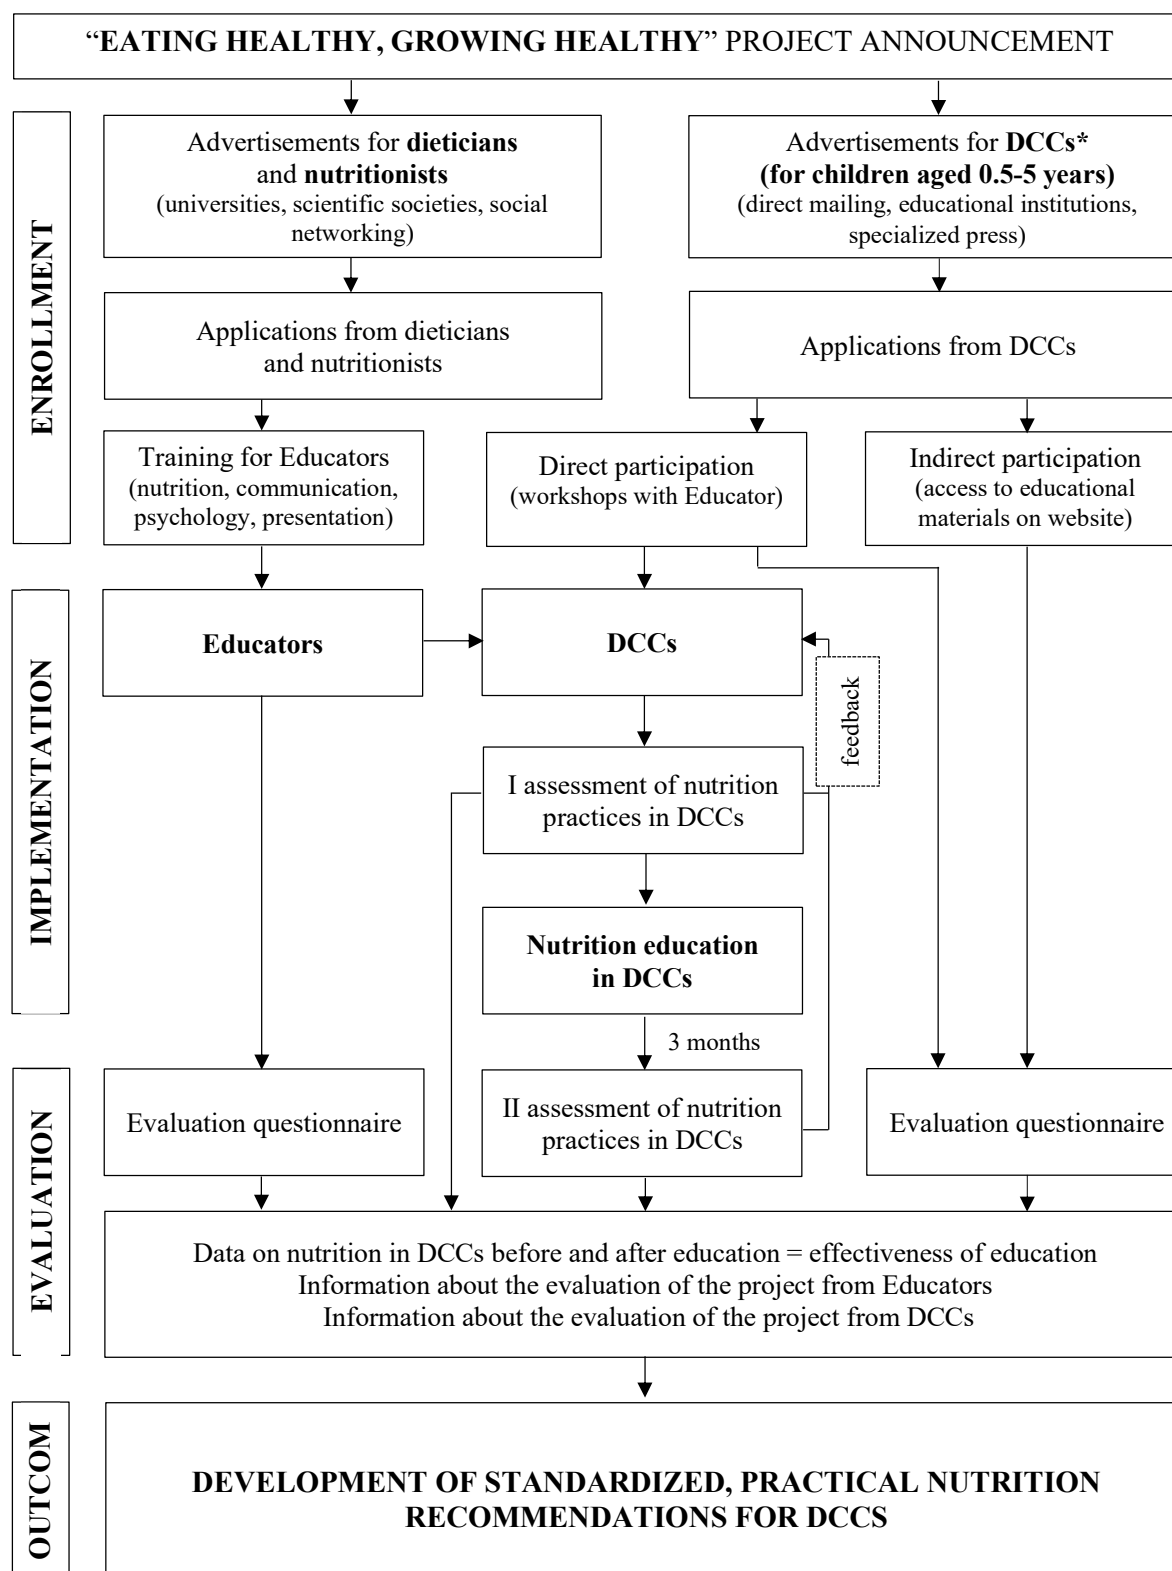

Supplement: s1 [file s1]
